# Supplementary material
Source: publisher figshare collection journal article supplement (https://acs.figshare.com/ndownloader/files/4276774)
Supplement: Supplementary file 1 [file 4276774]

## *Supplementary Methodology*

### *UPLC-MS analysis*

Samples were prepared by reconstitution in 90µl HPLC grade water followed by vortex mixing (15 seconds), centrifugation (11 337g, 15 minutes) and transfer to vials. Samples were analysed by an Acquity UPLC (Waters Corp. Milford, USA) coupled to a LTQ-Orbitrap mass spectrometry system (Thermo Fisher Scientific, Bremen, Germany) operating in electrospray ionisation mode (4). Samples were analysed consecutively in positive ion mode followed and then consecutively in negative ion mode. Chromatographic separations were performed employing an ACQUITY UPLC BEH 1.7µm-C<sub>18</sub> column (2.1 x 100mm, Waters Corp. Milford, USA). Solvent A and solvent B were 0.1% formic acid in water and 0.1% formic acid in methanol, respectively. In positive ion mode a flow rate of 0.40ml.min<sup>-1</sup> was applied with a gradient elution profile (100% A for 1 minute and subsequently ramped to 100% B (curve 5) over 15 minutes, followed by a 4 minute hold at 100% B before a rapid return to 100% A and a hold for 2 minutes). In negative ion mode a flow rate of 0.36ml.min<sup>-1</sup> was applied with a gradient elution program (100% A for 2 minutes and subsequently ramped to 100% B (curve 4) over 15 minutes, followed by a 5 minute hold at 100% B before a rapid return to 100% A and a hold for 2 minutes). The column and samples were maintained at temperatures of 50°C and 4°C, respectively. A 10µl sample volume was introduced onto the column and 50% of the column effluent was transferred to the mass spectrometer. Centroid MS scans were acquired in the mass range of 50-1000Th using the Orbitrap mass analyser operating with a target mass resolution of 30 000 (FWHM as defined at m/z 400) and a scan time of 0.4s. Mass calibration was performed before each analytical batch using an instrument manufacturer defined calibration mixture (ThermoFisher Scientific, Bremen, Germany).

## Data processing of UPLC-MS data

All data was converted to netCDF format using the FileConverter program in the XCalibur software package (ThermoFisher Scientific, Bremen, Germany). Raw data processing. All raw data (in.raw file format) were converted to netCDF file format with the FileConverter program available in XCalibur (ThermoFisher Scientific, Bremen, Germany).

## XCMS deconvolution.

XCMS is an open-source deconvolution program available for LC-MS data.(1) Deconvolution using the XCMS program was performed using identical settings to those reported previously(2) with the exception of s/n threshold = 3, step = 0.02, m/z diff = 0.05 and for grouping bandwidth = 10 and mzwidth = 0.05. The esi program (<http://msbi.ipb-halle.de/msbi/esi/>) available with the XCMS software package was used to write peak output files to an annotated version (as a .csv file) which is more appropriate for these studies. XCMS and esi were run using R version 2.6.0.

## Quality Assurance

The performance of analytical instrumentation has to be assessed robustly to ensure that data are of comparable high quality within an analytical run. An approach based on the periodic analysis of a standard biological Quality Control sample (QC sample) together with the patient samples is now accepted as a quality assurance strategy in metabolic profiling. (3, 4) A similar Quality Assurance protocol has been followed in this metabolomic study to assess the repeatability for thousands of endogenous metabolites. A set of pooled QC samples were prepared by mixing equal aliquots from all the samples in a single study. A QC sample is

then injected after every fourth patient sample in each analytical run (a *lead-in* of 10 consecutive QC injections was performed at the start of every analytical run to equilibrate the IPLC column response). At the end of the experimental run, and after XCMS deconvolution each detected peak is normalised to the QC sample using robust Loess signal correction (R-LSC). Here Locally Weighted Scatterplot Smoothing (LOESS) is performed on the QC data with respect to the order of injection. A cubic spline correction curve for the whole analytical run is then interpolated, to which the total data set for that peak is normalized. Using this procedure any attenuation of peak response over an analytical run (i.e. confounding factor due to injection order) is minimised.<sup>(3, 4)</sup> After R-LSC each peak is required to pass strict Quality Assurance criteria. While there are no generally accepted criteria for the assessment of repeatability in metabolomic data sets, the UK Food and Drug Administration (FDA) suggests a range of criteria that should be applied. In the guidance for bioanalytical method validation in industry <sup>(5)</sup> the FDA recommends for single analyte tests that tolerance limits are set such that the measured response detected in two-thirds of QC samples is within 15% of the QC mean, except for compounds with concentrations at or near the limit of quantification (LOQ), in these cases a tolerance of 20% is acceptable. In our case, the methods are not specific for one analyte of interest, but instead we aim to detect thousands of analytes, therefore an acceptance tolerance of 20% would seem to be appropriate. Any peak that did not pass the QA criteria was removed from the dataset and thus ignored in any subsequent data analysis.

## References:

1. Smith, C.A., Want, E.J., O'Maille, G., Abagyan, R., and Siuzdak, G. 2006. XCMS: processing mass spectrometry data for metabolite profiling using nonlinear peak alignment, matching, and identification. *Anal Chem* 78:779-787.
2. Brown, M., Dunn, W.B., Dobson, P., Patel, Y., Winder, C.L., Francis-McIntyre, S., Begley, P., Carroll, K., Broadhurst, D., Tseng, A., et al. 2009. Mass spectrometry tools and metabolite-specific databases for molecular identification in metabolomics. *Analyst* 134:1322-1332.
3. van der Greef, J., Martin, S., Juhasz, P., Adourian, A., Plasterer, T., Verheij, E.R., and McBurney, R.N. 2007. The art and practice of systems biology in medicine: mapping patterns of relationships. *J Proteome Res* 6:1540-1559.
4. Zelena, E., Dunn, W.B., Broadhurst, D., Francis-McIntyre, S., Carroll, K.M., Begley, P., O'Hagan, S., Knowles, J.D., Halsall, A., Wilson, I.D., et al. 2009. Development of a robust and repeatable UPLC-MS method for the long-term metabolomic study of human serum. *Anal Chem* 81:1357-1364.
5. CDER. 2001. Guidance for Industry, Bioanalytical Method Validation. F.a.D.A. Centre for Drug Valuation and Research, editor.

Table SI. The putatively identified metabolites that were significantly different between the cord plasma study (SGA vs. Control) and RUPP plasma study (Normal vs. RUPP).

| Putative Metabolite Identity based on exact mass                                                                                                                                                                                                                                                                                                                                                                                                                                                                                      | Venous Cord Plasma |           | RUPP model |           |
|---------------------------------------------------------------------------------------------------------------------------------------------------------------------------------------------------------------------------------------------------------------------------------------------------------------------------------------------------------------------------------------------------------------------------------------------------------------------------------------------------------------------------------------|--------------------|-----------|------------|-----------|
|                                                                                                                                                                                                                                                                                                                                                                                                                                                                                                                                       | p-value            | direction | p-value    | direction |
| Cervonyl carnitine <b>AND/OR</b> 1 $\alpha$ ,25-dihydroxy-18-oxocholecalciferol                                                                                                                                                                                                                                                                                                                                                                                                                                                       | 3.09E-06           | DOWN      | 0.004      | UP        |
| PC(20:4/0:0) <b>AND/OR</b> LysoPC(20:4)                                                                                                                                                                                                                                                                                                                                                                                                                                                                                               | 6.57E-06           | DOWN      | 0.001      | UP        |
| LysoPC(14:0) <b>OR</b> PC(O-12:0/2:0) <b>OR</b> LysoPC(14:0) <b>OR</b> 1,25-dihydroxy-24-oxo-23-azaergocalciferol                                                                                                                                                                                                                                                                                                                                                                                                                     | 6.63E-06           | DOWN      | 0.008      | UP        |
| LysoPC(18:2)                                                                                                                                                                                                                                                                                                                                                                                                                                                                                                                          | 7.81E-06           | DOWN      | 0.012      | UP        |
| PC(O-16:1/2:0) <b>AND/OR</b> PC(16:0/2:0) <b>AND/OR</b> PC(18:1/0:0) <b>AND/OR</b> LysoPC(18:1) <b>AND/OR</b> LysoPC(20:4)                                                                                                                                                                                                                                                                                                                                                                                                            | 8.42E-06           | DOWN      | 0.003      | UP        |
| 1 $\alpha$ ,25-dihydroxy-24-oxo-23-azaergocalciferol                                                                                                                                                                                                                                                                                                                                                                                                                                                                                  | 9.55E-06           | DOWN      | 0.008      | UP        |
| LysoPC(16:1) <b>OR</b> Cervonyl carnitine                                                                                                                                                                                                                                                                                                                                                                                                                                                                                             | 1.10E-05           | DOWN      | 0.005      | UP        |
| LysoPC(18:0) <b>OR</b> PC                                                                                                                                                                                                                                                                                                                                                                                                                                                                                                             | 3.80E-05           | DOWN      | 0.0004     | UP        |
| Clupanodonyl carnitine <b>AND/OR</b> Vaccenyl carnitine                                                                                                                                                                                                                                                                                                                                                                                                                                                                               | 3.90E-05           | DOWN      | 0.002      | UP        |
| N-propyl-16,16-dimethyl-5Z,8Z,11Z,14Z-docosatetraenoyl amine                                                                                                                                                                                                                                                                                                                                                                                                                                                                          | 5.30E-05           | DOWN      | 0.025      | UP        |
| LysoPC(16:0) <b>OR</b> PC(O-14:0/2:0) <b>OR</b> Docosa-4,7,10,13,16-pentaenoyl carnitine <b>OR</b> Clupanodonyl carnitine                                                                                                                                                                                                                                                                                                                                                                                                             | 5.50E-05           | DOWN      | 0.002      | UP        |
| Docosa-4,7,10,13,16-pentaenoyl carnitine <b>OR</b> Clupanodonyl carnitine                                                                                                                                                                                                                                                                                                                                                                                                                                                             | 6.40E-05           | DOWN      | 0.004      | UP        |
| 12-oxo-c-LTB3 <b>AND/OR</b> S-(9-deoxy-delta9,12-PGD2)-glutathione                                                                                                                                                                                                                                                                                                                                                                                                                                                                    | 6.90E-05           | DOWN      | 0.014      | UP        |
| LysoPC(18:1) <b>OR</b> LysoPC(18:1) <b>OR</b> PC(O-16:1/2:0)                                                                                                                                                                                                                                                                                                                                                                                                                                                                          | 7.60E-05           | DOWN      | 0.008      | UP        |
| Taurocholate <b>OR</b> Taurohyocholate <b>OR</b> Tauroursocholic acid <b>OR</b> Taurallocholic acid <b>OR</b> Tauro-b-muricholic acid                                                                                                                                                                                                                                                                                                                                                                                                 | 1.32E-04           | DOWN      | 0.010      | UP        |
| LysoPC(18:0) <b>OR</b> PC(O-16:0/2:0) <b>OR</b> tetracosapentaenoyl carnitine                                                                                                                                                                                                                                                                                                                                                                                                                                                         | 4.35E-04           | DOWN      | 0.001      | UP        |
| tetracosapentaenoyl carnitine                                                                                                                                                                                                                                                                                                                                                                                                                                                                                                         | 4.74E-04           | DOWN      | 0.002      | UP        |
| Phosphatidate                                                                                                                                                                                                                                                                                                                                                                                                                                                                                                                         | 0.001              | DOWN      | 0.015      | UP        |
| LysoPC(18:0) <b>OR</b> PC                                                                                                                                                                                                                                                                                                                                                                                                                                                                                                             | 0.001              | DOWN      | 0.002      | UP        |
| PC <b>OR</b> leukotriene C5                                                                                                                                                                                                                                                                                                                                                                                                                                                                                                           | 0.002              | DOWN      | 0.004      | UP        |
| PC(O-14:0/18:0) <b>OR</b> PC(O-16:0/16:0) <b>OR</b> Tricosanamide <b>OR</b>                                                                                                                                                                                                                                                                                                                                                                                                                                                           | 0.002              | DOWN      | 0.027      | UP        |
| Linoelaidyl carnitine <b>OR</b> (+/-)-N-(1-methyl-2-hydroxy-2-phenyl-ethyl) arachidonoyl amine <b>OR</b> N-eicosanoyl-ethanolamine                                                                                                                                                                                                                                                                                                                                                                                                    | 0.002              | DOWN      | 0.004      | UP        |
| 1-18:1-lysoPE <b>OR</b> PE(18:1(9Z)/0:0) <b>OR</b> PE(18:1(9Z)/0:0)[U] <b>OR</b> N-(5-hydroxy-pentyl) arachidonoyl amine <b>OR</b> N-propyl N-(2-hydroxy-ethyl) arachidonoyl amine <b>OR</b> (+)N-(2S-hydroxy-propyl) a,a-dimethylarachidonoyl amine <b>OR</b> N-(2-isopropyl-5Z,8Z,11Z,14Z-eicosatetraenoyl)-ethanolamine <b>OR</b> N-(5Z,8Z,11Z,14Z-tricosatetraenoyl)-ethanolamine <b>OR</b> N-(17,17-dimethyl-5Z,8Z,11Z,14Z-heneicosatetraenoyl)-ethanolamine <b>OR</b> N-(17-methyl-5Z,8Z,11Z,14Z-docosatetraenoyl)-ethanolamine | 0.002              | DOWN      | 0.012      | UP        |
| N-(11Z-eicosaenoyl)-ethanolamine <b>OR</b> Palmitoylcarnitine <b>OR</b> 1-(1Z-hexadecenyl)-sn-glycero-3-phosphoethanolamine <b>OR</b> CPA(18:0/0:0)                                                                                                                                                                                                                                                                                                                                                                                   | 0.004              | DOWN      | 0.046      | UP        |
| PC(O-16:0/18:1) <b>AND/OR</b> PC(O-18:0/16:1) <b>AND/OR</b> PC(16:0/18:0)                                                                                                                                                                                                                                                                                                                                                                                                                                                             | 0.004              | DOWN      | 0.001      | UP        |
| Tocopherol nicotinate <b>OR</b> 11a-(4-dimethylaminophenyl)-1a,25-dihydroxyvitamin D3 <b>OR</b> Tocopherol nicotinate <b>OR</b> PC(O-18:0/O-2:1)                                                                                                                                                                                                                                                                                                                                                                                      | 0.005              | DOWN      | 0.001      | UP        |
| Stearoylglycerone phosphate <b>OR</b> 1-Oleoyl-lysophosphatidic acid <b>OR</b> LPA(18:1) <b>OR</b> lysoPE(16:0) <b>OR</b> lysoPC(13:0) <b>OR</b> Aplidiasphingosine <b>OR</b> Sphingofungin A                                                                                                                                                                                                                                                                                                                                         | 0.005              | DOWN      | 0.005      | UP        |
| 1 $\alpha$ ,25-dihydroxy-11 $\alpha$ -phenylcholecalciferol                                                                                                                                                                                                                                                                                                                                                                                                                                                                           | 0.006              | DOWN      | 0.049      | DOWN      |
| (15Z)-Tetracosenoic acid <b>OR</b> 10,13-Dimethyl-11-docosyne-10,13-diol <b>OR</b> trans-selacholeic acid <b>OR</b> nervonic acid <b>OR</b> Conessine                                                                                                                                                                                                                                                                                                                                                                                 | 0.006              | DOWN      | 0.023      | UP        |
| N-Glycoloylganglioside GM2 <b>OR</b> PC - more than 20 hits                                                                                                                                                                                                                                                                                                                                                                                                                                                                           | 0.007              | DOWN      | 0.021      | UP        |
| PC(16:0/22:5) <b>AND/OR</b> PC(18:0/20:5) <b>AND/OR</b> PC(18:1/20:4) <b>AND/OR</b> PC(16:1/22:4)                                                                                                                                                                                                                                                                                                                                                                                                                                     | 0.014              | DOWN      | 0.001      | DOWN      |
| PGD2-dihydroxypropylamine <b>OR</b> 15R-PGE2 methyl ester, 15-acetate                                                                                                                                                                                                                                                                                                                                                                                                                                                                 | 0.020              | DOWN      | 0.019      | UP        |

Figure S1

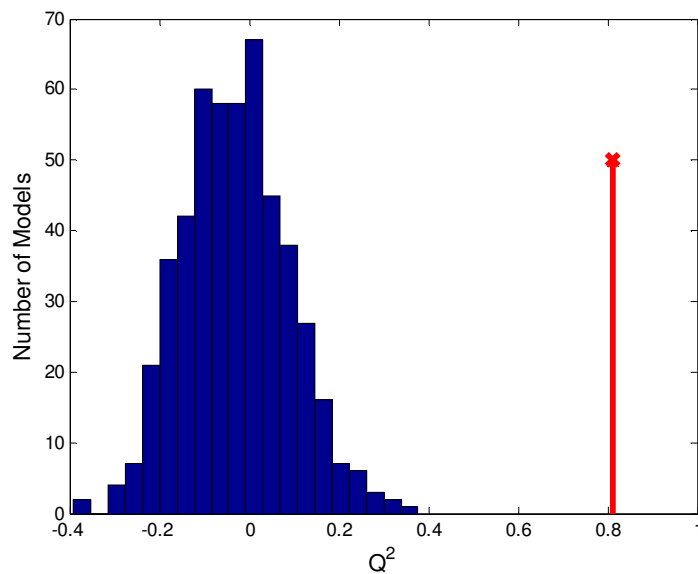

Figure S1. A cross-validated PLS-DA model of all the venous cord plasma metabolite features detected was built using two latent factors with an  $R^2 = 0.88$ ,  $Q^2 = 0.81$ , and an AUC of 1. Here a reference  $Q^2$  distribution is obtained by calculating all possible PLS-DA models under random reassignment of the case/control labels for each measured metabolic profile. If the correctly labeled model's  $R^2$  (red line) value is close to the centre of the reference distribution then the model performs no better than a randomly assigned model and is therefore invalid. A non-parametric test comparing the 'candidate' model (red line) and the permuted  $H_0$  distribution (blue histogram) showed that the probability of a model of this quality randomly occurring was less than 0.001.

Figure S2

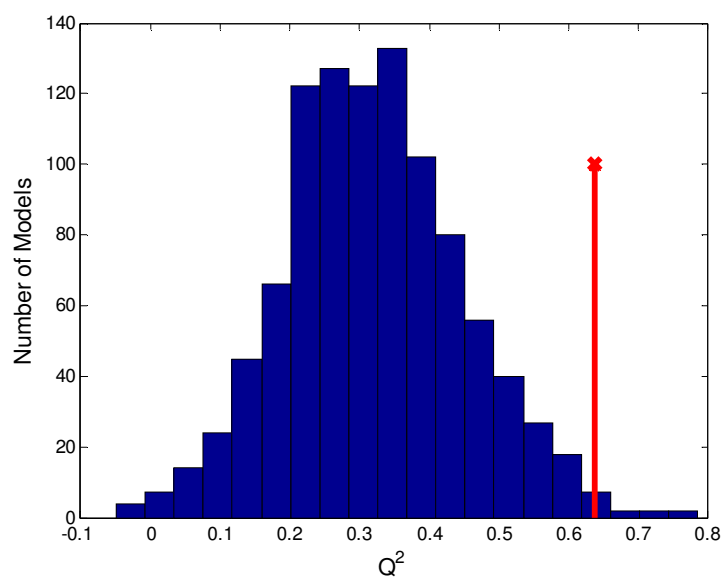

Figure S2. A cross-validated PLS-DA model of all the RUPP plasma metabolite features detected was built using 2 latent factors with an  $R^2 = 0.69$ ,  $Q^2 = 0.63$ , and an AUC of 0.995. A non-parametric test comparing the ‘candidate’ model (red line) and the permuted  $H_0$  distribution (blue histogram) showed that the probability of a model of this quality randomly occurring was less than 0.01.

Figure S3(a)

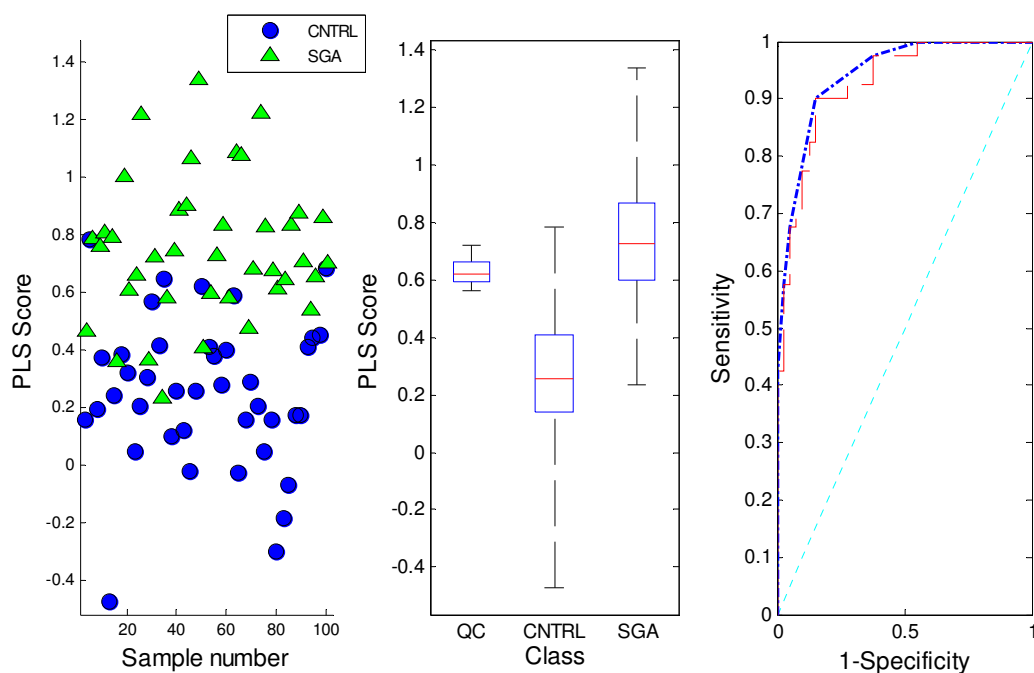

Figure S3(b)

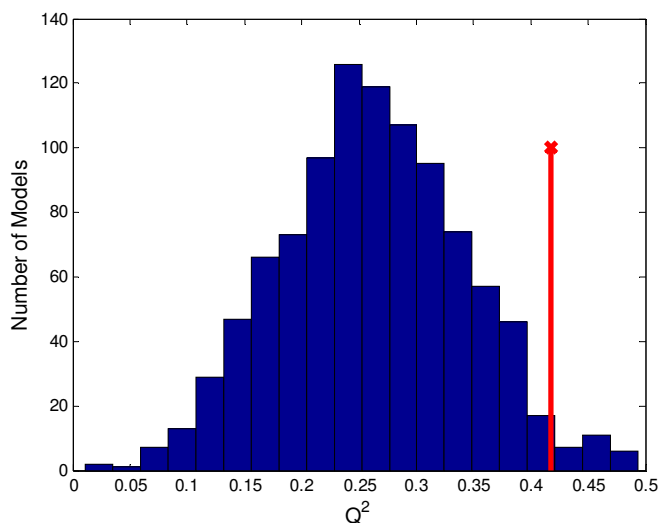

Figure S3. A cross-validated PLS-DA model (3 latent variables) constructed using the week-15 data, using only those metabolites that previously showed significant difference in the VCP study **and** were reproducibly detected in the week-15 study ( $n=516$ ). This had a  $Q^2 = 0.48$ ,  $R^2 = 0.43$ , AUC of 0.94 and an optimal discriminatory odds ratio of 49 (95% CI 13-184). A non-parametric test comparing the ‘candidate’ model (red line) and the permuted  $H_0$  distribution (blue histogram) showed that the probability of a model of this quality randomly occurring was less than 0.05.



Figure S4(a)

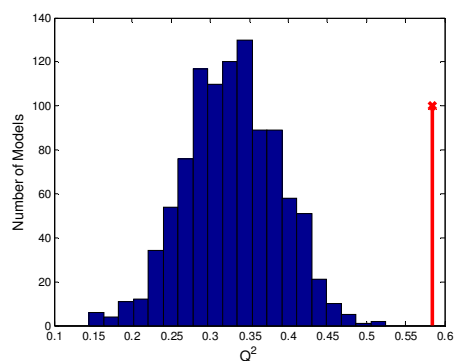

Figure S4(b)

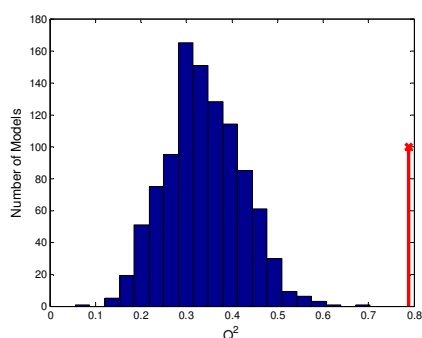

Figure S4(c)

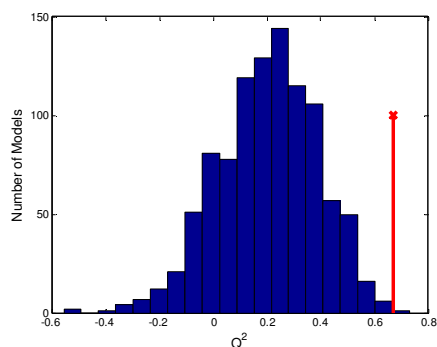

Figure S4. The PLS-DA model predictions for the final 19-metabolite signature found by the Genetic Algorithm Search program (a) Model predictions for the week-15 plasma data.  $R^2 = 0.61$ ,  $Q^2 = 0.56$ , an AUC of 0.90 and an optimal odds ratios of 44 (95% CI 9 – 214). A non-parametric test comparing the ‘candidate’ model (red line) and the permuted  $H_0$  distribution (blue histogram) showed that the probability of a model of this quality randomly occurring was less than 0.001. (b) Model predictions for the Venous Cord Plasma data.  $R^2 = 0.83$ ,  $Q^2 = 0.81$ , and an AUC of 1. A non-parametric test comparing the ‘candidate’ model (red line) and the permuted  $H_0$  distribution (blue histogram) showed that the probability of a model of this quality randomly occurring was less than 0.001. (c) Model predictions for the RUPP data.  $R^2 = 0.66$ ,  $Q^2 = 0.65$ , and an AUC of 0.98. A non-parametric test comparing the ‘candidate’ model (red line) and the permuted  $H_0$  distribution (blue histogram) showed that the probability of a model of this quality randomly occurring was less than 0.001.
